## 21 **Abstract**

22 Cervical vertebral maturation (CVM) is widely used to evaluate growth potential in the field of  
23 orthodontics. The aim of this study is to develop an artificial intelligence (AI) algorithm to  
24 automatically predict the CVM stages in terms of growth phases using the cone-beam computed  
25 tomographic (CBCT) images. A total of 30,016 slices obtained from 56 patients with the age  
26 range of 7-16 years were included in the dataset. After cropping the region of interest (ROI), a  
27 convolutional neural network (CNN) was built to classify the slices based on the presence of a  
28 good vision of vertebrae for classification of the growth stages. The output was used to train  
29 another model capable of categorizing the slices into phases of growth, which were defined as  
30 Phase I (prepubertal, CVM stages 1 and 2), phase II (circumpubertal, CVM stage 3), and phase  
31 III (postpubertal, CVM stages 4, 5, and 6). After training the model, 88 unused images  
32 belonging to 3 phases were used to evaluate the performance of the model using multi-class  
33 classification metrics. The average classification accuracy of the first and second CNN-based  
34 deep learning models were 96.06% and 95.79%, respectively on the validation dataset. The  
35 multi-class classification metrics applied to the new testing dataset also showed an overall  
36 accuracy of 84% for predicting the growth phase. Moreover, phase I ranked the highest accuracy  
37 in terms of F1 score (87%), followed by phase II (83%), and phase III (80%) on new images.  
38 Our proposed models could automatically detect the C2-C4 vertebrae required for CVM staging  
39 and accurately classify slices into 3 growth phases without the need for annotating the shape and  
40 configuration of vertebrae. This will result in developing a fully automatic and less complex  
41 system with reasonable performance, comparable to expert practitioners.

42

## 43 **Author Summary**

44 The skeletal age of orthodontic patients is a critical factor in planning the proper orthodontic  
45 treatment. Thus, an accurate assessment of the growth stage can result in better treatment  
46 outcomes and reduced treatment time. Traditionally, 2-D cephalometric radiographs obtained  
47 during the orthodontic examination were used for estimating the skeletal age using the three  
48 cervical vertebrae. However, this method was subjective and prone to errors as different  
49 orthodontists could interpret the features differently. Moreover, 2-D images provide only limited  
50 information as they only capture two dimensions and involve superimpositions of neighbour  
51 structures. In the present study, machine learning models are applied to 3-D cephalometric  
52 images to predict the growth stage of patients by analyzing the shape and pattern of cervical  
53 vertebrae. This method has the potential to improve treatment outcomes and reduce the treatment  
54 time for orthodontic patients. Additionally, it can contribute to the development of more  
55 personalized treatment plans and advance our understanding of the growth and development of  
56 the craniofacial complex.

57

58

59

60

61

## 62 **Introduction**

63           Understanding the growth and development process of children and adolescents is an  
64 important task in medicine and dentistry for the diagnosis or treatment [1, 2]. Bone age, which is  
65 routinely requested by pediatricians, endocrinologists and orthodontists, is more accurate in  
66 determining the maturation of an individual [3]. In the field of orthodontics, apart from selecting  
67 the appropriate appliance to produce the required change in the rate and direction of jaw growth,  
68 the treatment timing is critical [1, 4].

69           Traditionally, analyzing the pattern of ossification of the non-dominant wrist bones using  
70 plain wrist radiographs is a fairly predictable method for skeletal age assessment [2]. Hand-wrist  
71 radiographs have been the gold standard for determining skeletal age due to simplicity, minimum  
72 radiation exposure, and the availability of multiple ossification centers [5]. However, the  
73 methods are criticized for the time spent and experience required, inter- and intra-rater variability  
74 [6].

75           Evaluating cervical vertebral maturation (CVM) -as a method to determine skeletal age- can be  
76 performed on the lateral cephalometric radiographs using the changes in the size of vertebral  
77 bodies as well as shapes of lower and upper borders of C2, C3 and C4 vertebrae [7].  
78 Cephalometry is widely used in orthodontics for the diagnosis, planning, growth and  
79 development evaluation and follow up of an orthodontic treatment or progress of a  
80 developmental disorder [8, 9]. Thus, in orthodontics, an obvious advantage of CVM evaluation is  
81 prevention of additional exposure to radiation by eliminating the need for a hand-wrist  
82 radiograph [4].

83 Baccetti et al. introduced six stages using the morphological changes in the C2, C3 and C4  
84 vertebral bodies, which are commonly observable on a single lateral cephalogram, independent  
85 of patient gender [4]. According to this evidence, CVM stages 1 and 2 have been referred to as  
86 prepubertal, CVM stage 3 has been referred to as circumpubertal and CVM stages 4, 5, and 6  
87 have been defined as postpubertal [10].

88 Several studies have stated that CVM is a reliable method of age assessment that can replace  
89 hand-wrist radiographs [5, 7]. It has been demonstrated that CVM stages are useful clinical tools  
90 to evaluate growth height and mandibular velocities according to the correlation between CVM,  
91 chronological age and hand-wrist maturation [11, 12]. However, others have reported that this  
92 technique is inherently subjective and influenced by the practitioner's experience therefore,  
93 requires support by other biological indicators [13]. Moreover, some authors believe that due to  
94 the high-level of radiographic noise and intrinsic limitations of 2D lateral cephalograms that  
95 affect the magnification and image accuracy, the estimation of bone age using CVM may be  
96 difficult for practitioners lacking adequate knowledge and experience [4, 13].

97 Based on the limitations listed above and the fact that accurate image analysis plays a crucial  
98 role in achieving a successful orthodontic outcome, automatizing the task will provide time  
99 saving, efficiency, accuracy and repeatability in orthodontic treatment planning and assist  
100 clinicians in alleviating their enormous workload [4].

101 Machine learning (ML), uses algorithms to predict the unseen data based on the learnings  
102 obtained from intrinsic statistical patterns and structures in data [14, 15]. Deep learning (DL)  
103 refers to network architectures with more than one hidden layer that are capable of analyzing  
104 complex data structures such as images [14, 16]. DL models require less expert knowledge  
105 compared to classical ML methods as they can learn features that adapt to the input data [15].

106 Recently, the introduction of convolutional neural networks (CNN) algorithms using DL, allows  
107 for direct interference, recognition and classification of medical images [17]. CNN has been  
108 utilized in various aspects of science including speech recognition, detecting objects, analyzing  
109 emotions and face recognition. However, its great breakthroughs in major image competitions  
110 have made it a popular technique for medical image analysis and computer visual tasks [18]. In  
111 the field of dentistry, CNNs have performed tasks such as caries, bone loss and apical lesions  
112 detection as well as classifying, segmenting and detecting anatomic hard- and soft-tissue  
113 landmarks [19].

114 Several AI techniques have been employed for cephalometric radiograph analysis with the focus  
115 on auto-identification of landmarks [20]. However, studies on the assessment of skeletal age  
116 using lateral cephalograms are in the beginning stage [16]. In addition, CVM analysis on lateral  
117 cephalometric radiographs using more recent DL models vary in classification accuracy due to  
118 the differences in preprocessing methods and the applied models [21].

119 Recently, a new imaging technology- cone beam computed tomography (CBCT) is becoming  
120 exceedingly popular in the field of orthodontics, which helps in eliminating the problems caused  
121 by magnification [22]. It allows orthodontists to evaluate patients' hard and soft tissue in three  
122 dimensions (3D) [23]. Besides, it is superior to conventional CTs due to the lower radiation dose,  
123 clearer images, more precision and relatively low cost [5, 24].

124 Given the importance of CVMs classification in clinical application is to determine the  
125 optimum timing for growth modification treatments, and as there is no data available regarding  
126 the performance of CNN models to estimate the CVM on 3D radiographs, the objective of the  
127 proposed study is to demonstrate the application of CNN in dental imaging for classifying  
128 prepubertal, circumpubertal, and postpubertal phases of growth that works in a fully automatic

129 manner without the need for segmentation or annotating (labelling) the images. As the major  
130 clinical application of the CVMs classification is to determine the optimum timing for growth  
131 modification treatments, we are using this type of categorization which would be more beneficial  
132 for clinical decision-making.

## 133 **Results**

134 Figure 1 represents a summary of the process from extracting patients' CBCT images to  
135 classifying the phase of growth through CNN models.

### 136 **Fig 1. Diagram of the whole process**

137 Table 1 summarizes the descriptive characteristics of the images and growth phases included in  
138 the study. CBCT images belonging to 56 patients (consisting of 536 slices per patient) were first  
139 categorized into three growth phases by two orthodontists with an inter-rater reliability of 73%.  
140 In cases of conflict, the growth phase was determined by the third orthodontist.

141 **Table 1. Descriptive information of the included images**

| Growth phase | Number of patients | Age                                             | Number of slices |
|--------------|--------------------|-------------------------------------------------|------------------|
|              | n (%)              | (mean $\pm$ SD)                                 | n (%)            |
| I            | 18(32%)            | 8 years and 9 month $\pm$ 1 year and 5 months   | 536(31.4%)       |
| II           | 15(27%)            | 11 years $\pm$ 9 months                         | 527(49%)         |
| III          | 23(41%)            | 13 years and 7 months $\pm$ 1 year and 3 months | 642(37.6%)       |

142  
143 Table 2 demonstrates the performance of the first CNN model to predict preferred vs.  
144 nonpreferred views of C2-C4 vertebrae (ROI) on a new set of images as the test dataset. The

145 training and validation accuracies were found to be 91.78% and 88.19%, respectively. According  
 146 to the table, all slices of new test images including a good vision of vertebrae for classification  
 147 (n=41) could be predicted correctly.

148 **Table 2. Model performance of detecting ROI on the test dataset**

|                     |               | Predicted ROI <sup>a</sup> |           |
|---------------------|---------------|----------------------------|-----------|
|                     |               | Not Preferred              | Preferred |
| Actual(true)<br>ROI | Not Preferred | 103                        | 72        |
|                     | Preferred     | 0                          | 41        |

149 <sup>a</sup> ROI: region of interest

150 Accuracy, recall, precision, and F1-score were calculated using multi-class classification metrics  
 151 for the second CNN network. Table 3 demonstrates the multi-class classification metrics applied  
 152 to the validation dataset and a group of 88 images as the testing dataset. The overall accuracy on  
 153 this set of new slices was found to be 84%. The average classification accuracy of our CNN-  
 154 based deep learning model was 98.92% and 95.79% on the training and validation datasets,  
 155 respectively.

156 **Table 3. Model performance using the multi-class classification metrics on validation and test**  
 157 **datasets for categorizing slices into three growth phases**

| Growth<br>phase | Test data |        |          |          | Validation data |        |          |          |
|-----------------|-----------|--------|----------|----------|-----------------|--------|----------|----------|
|                 | Precision | Recall | F1-score | Accuracy | Precision       | Recall | F1-score | Accuracy |
| I               | 0.77      | 1.00   | 0.87     | 0.84     | 0.97            | 0.97   | 0.97     | 0.96     |
| II              | 1.00      | 0.71   | 0.83     |          | 0.94            | 0.93   | 0.93     |          |
| III             | 0.83      | 0.77   | 0.80     |          | 0.96            | 0.97   | 0.96     |          |

158



159 Figure 2 also represents the model performance for classifying the cervical vertebrae into 3  
160 growth phases on validation and testing datasets.

161 **Fig 2. Confusion matrices representing the performance of the model to classify the**  
162 **vertebrae into 3 growth phases on a) validation and b) testing datasets.**

## 163 **Discussion**

164 In this study, CNN models were designed to classify images according to the presence or  
165 absence of the ROI, and then according to the features of vertebrae into three phases of growth.  
166 The annotating step was skipped in the proposed model, which resulted in a more time-efficient  
167 image pre-processing. To fully automate the process of CVM classification, a recent study by  
168 Atici et al. [25] was conducted. They proposed an innovative custom-designed deep CNN to  
169 detect and classify the CVM stages. A layer of tunable directional filters was applied to fully  
170 automate the procedure and they achieved a validation accuracy of 84.63% in CVM stage  
171 classification using 1018 cephalometric images from 56 patients. They stated that this level of  
172 accuracy was higher compared to other DL models investigated. Our proposed fully-automated  
173 model was successful in determining the growth phase of patients using the CVM staging with a  
174 validation accuracy of 95.79%, which is higher compared to Atici et al. findings. This can be due  
175 to the higher resolution and accuracy of the input images (CBCT slices) in our study that  
176 enhances the training accuracy of the model.

177 Depending on the task to be performed, various architectures of CNN models have been  
178 proposed so far. For instance, Makaremi et al. utilized a semi-automatic CNN-based model to  
179 assess the maturation of cervical vertebrae; however, it needed manual segmentation of the  
180 region of interest [26]. Since then, many novel methods of image segmentation (such as U-Net)

181 based on FCN have been utilized for medical image analysis [27, 28]. In a study conducted by  
182 Seo et al. the performance of six CNN-based DL models were evaluated and compared for CVM  
183 analysis on conventional 2D cephalometric images. Inception-ResNet-v2 demonstrated the  
184 highest classification accuracy due to its capability of focusing on all three vertebrae (C2-C4)  
185 compared to other DL models. They stated that most studied DL techniques classify CVM by  
186 focusing on a specific area (region of interest) of the cervical vertebrae. Thus, they suggested  
187 that application of high-quality input data and better-performing CNN architectures that are  
188 capable of segmenting images will help in creating models with higher performance [29].

189 Our study used CBCT slices of the vertebrae to determine the skeletal age of the patients.  
190 CBCT accuracy and reliability in several aspects of dentistry such as assessment of tumor  
191 lesions, orthognathic surgery planning and implant placement have been reported [30]. There is  
192 universal agreement that CBCT images are more accurate compared to 2D cephalometrics for  
193 craniofacial studies [31, 32]. This can be an explanation for the higher amount of accuracy our  
194 model achieved. A recent systematic review by Rossini et al. also showed that 3D cephalometric  
195 analysis outperforms the conventional 2D cephalometrics in terms of accuracy and  
196 reproducibility [22].

197 However, the amount of radiation exposure, which is higher in comparison to a 2D  
198 cephalogram, is the biggest controversy about its use in dental imaging [33]. It is suggested that  
199 CBCT images can be a valid and useful tool for assessment of skeletal age using CVM, although  
200 they should not be used solely for that purpose [34].

201 Our model accuracy on predicting a group of unseen images was greater than 80% with  
202 the highest performance at phase I (F1 score:87%), which is consistent with previous studies.  
203 According to the literature, CVM stages are sometimes difficult to differentiate according to the

204 continuous nature of morphological changes in cervical vertebrae (McNamara and Franchi  
205 2018). Thus, CS 1 (meaning no development) and CS 6 (maturity) stages are easier to identify.  
206 Our model performed well in predicting the CS3 (phase II) with the F1 score of 85%. This was  
207 in contrast with a study conducted by Zhou et al. [36] who reported an F1 score of 31% for  
208 diagnosing the pubertal spurt on cephalometric radiograph. As the authors mentioned, this could  
209 be due to their insufficient training set of CS3 for growth spurt is short and difficult to find in  
210 clinical practice.

211 Hand-wrist radiographs were not used which can be described as a limitation of this  
212 study. However, this study focused solely on classifying the patients at their pre-, circum-, and  
213 postpubertal growth stages using sagittal slices of the CBCT images and evaluation of the  
214 reliability of this method was not taken into consideration.

215 In contrast to previous studies, we only classified patients according to the three growth  
216 phases. However, according to the main clinical application of CVM staging, which is to  
217 determine the growth potential of the patients, our classification method can be justified in terms  
218 of orthodontic treatment planning and correction of the jaw discrepancies.

219 In conclusion, our proposed model could automatically detect the ROI (C2-C4) required  
220 for CVM staging and accurately classify images into 3 growth phases without the need for  
221 annotating the shape and configuration of vertebrae. This will result in developing a fully  
222 automatic and less complex system with reasonable performance, comparable to expert  
223 practitioners. Classical methods are time-consuming and prone to inter- and intra-rater variability  
224 thus, using methods that automate this process will be of value. Expansion and application of  
225 utilizing such DL models in clinical practice will enable practitioners to make more accurate  
226 diagnosis and treatment planning in a time-saving manner. Moreover, using 3D cephalometric

227 radiographs –which is the primary distinction of the proposed study from the previous ones-  
228 could enhance the performance and secure the reliability of the DL model in CVM classification.

229

## 230 **Materials and Methods**

231 This study was approved by the Health Research Ethics Board (HREB) of the University  
232 of Alberta (Approval number: Pro00118171). All patients aged between 7-16 years, who  
233 underwent CBCT (120 kVp, 5 mA and 4 sec) sagittal views of craniofacial structures between  
234 2013 and 2020 at the University of Alberta, Orthodontics clinic, were included in this study.

235 The inclusion criteria was as follows:

236 1- Patients without congenital or acquired malformation of the cervical vertebrae

237 2- Radiographs with good vision of C2, C3 and C4 vertebrae

238 Chronological age was collected and calculated based on the date of filming and date of birth.

239 Images of 56 patients were studied. All collected images were kept as DICOM format, so to

240 prepare them for further processing, they were all transformed to PNG images using the ITK-

241 SNAP software (726 \* 644 pixels). The sagittal views (cephalometric views), which consisted of

242 536 slices for each patient studied and classified by two expert Orthodontist Scientists (A. S. and

243 N. A.) with more than 6 years of experience. In the case of any conflicts, a third orthodontist (S.

244 F.) evaluated the slices for determining the class of CVM. CVM was classified into six stages

245 (CS1- CS6) according to the methodology from previous studies [4]. Then slices were grouped

246 into 3 growth phases (I, II, and III) by combining the CS1 and 2 as phase I, CS 3 as phase II, and

247 CS4, 5, and 6 as phase III. Then, the slices were exported into Google Colaboratory for CNN

248 training. Using the original image for classification may lead to poor performance of CNN

249 models since they will classify the cervical stage based on parts other than the shapes of the C2-  
250 C4 vertebrae. To overcome this problem, segmentation of the ROI around C2-C4 will enable the  
251 classifier model to focus more on these cervical vertebrae [16]. For this purpose, regions of  
252 interest (ROI) which included the C2-C4 vertebrae were cropped from the original slices for  
253 CVM classification. The result was a collection of 536 slices for each patient (a total of 30,016  
254 slices).

255 To fully automate the analysis from landmark detection to CVM classification without  
256 the need to label the target structures (C2-C4 vertebrae), two classification models capable of  
257 classifying the preferable view of C2-C4 vertebrae and estimating the growth phases using a 3D  
258 lateral cephalogram were created. In the first model, the resized and cropped ROI obtained from  
259 the original image, was used as input for the classifier without segmentation. The classifier  
260 model received a fixed image of size 344\*350 pixels that fitted the model as an input and  
261 classified the image based on presence or absence of the preferable view of all three vertebrae  
262 that is required for CVM classification. The output -slices including the preferred vision of  
263 vertebrae- was fed to the second CNN model, which predicted the three phases of growth as  
264 output. CNNs are types of DL methods consisting of minimum of three layers: input, hidden and  
265 output layers [37]. They apply supervised learning technique and called “backpropogation” and  
266 have been utilized for various image analysis tasks such as classification, segmentation and  
267 landmark detection [38]. In addition to requiring little preprocessing techniques, CNNs are  
268 devoid of manual feature handcrafting [3]. The main constituents of a CNN model are: 1)  
269 Convolutional layers (the first step) with the purpose of extracting features such as gradients or  
270 edges from the input image using the mathematical transformations, 2) Non-linear activation  
271 functions, which is sandwiched between any two layers and guides the input signals into output

272 signals required for the NN to act, 3) Pooling layer, which reduces the number of parameters to  
273 learn and the amount of computation to summarize the features generated by the convolution  
274 layer, and 4) Fully connected layers that are responsible for the interpretation of the feature  
275 representations learned by preceding layers [39].

276 To train the first CNN model for classifying the preferred vs. not preferred views of  
277 vertebrae, a labeled dataset is essential. We used 638 slices belonging to two categories from  
278 which 127 slices (20%) were selected as validation dataset and remaining slices were used for  
279 training. U-Net, a CNN model capable of performing image classification based on fully  
280 convolutional networks (FCN) was used [40]. It is a U-shaped model consisting of a contracting  
281 path, which goes down to the symmetry point and an expanding path that goes up from that  
282 point. The first path, which contains repeated applications of 3-3 convolutions with a rectified  
283 linear unit (ReLU) activation, and a 2-2 max pooling operation for downsampling, captures the  
284 characteristics of the input image and reduces its size. The second and third path, expanded the  
285 image for accurate segmentation and consisted of 3-3 convolutions with a ReLU activation  
286 function. The final layer included a 1-1 convolution and the model was compiled using the Adam  
287 optimizer and sparse categorical cross entropy loss function. The final output was a collection of  
288 a range of 21-35 slices ( $28.17 \pm 3.06$ ) for each patient thus, a total number of 1705 slices from 56  
289 patients (536 slices for phase I, 527 for phase II, and 642 slices for phase III) were finally  
290 obtained. From each phase, a collection of slices belonging to a patient was randomly selected as  
291 the test dataset, thus 88 slices (34, 26, and 28 slices representative of growth phase I, II, and III,  
292 respectively) were not input the second model

293 The second CNN model to classify the slices into three growth phases was trained using  
294 1617 slices (out of 1705 total slices), which were split into training (1294 or 80%) and validation

295 (323 or 20%) datasets. The architecture of the second model was the same as the first one except  
296 for removing the dropout from the third hidden layer, and the number of epochs (25 vs. 3). After  
297 training the model, 88 unused slices were used as the testing dataset to evaluate the performance  
298 of the model using multi-class classification metrics. All calculations and computations were  
299 completed using python (TensorFlow, NumPy, Matplotlib, and Keras packages).

## 300 **Acknowledgement**

301 The authors would like to thank Ashley Fossen for her assistance in data anonymization and for  
302 providing patients' DICOM files.

303

304

305

306

307

308

309

310

311

312

313

314

315

## 316 **References**

- 317 1-Korde SJ, Daigavane P, Shrivastav S. Skeletal Maturity Indicators-Review Article. *Int. J. Sci.*  
318 *Res* 2015; (6): 361–370.
- 319 2- Baldin CC, Kitt M, Costa ALF, Yasuda CL, Cendes F, Nahás-Scocate ACR. Evaluation of the  
320 skeletal maturation of cervical vertebrae with magnetic resonance imaging: a pilot study. *Braz*  
321 *J Oral Sci* 2017; (16): 1–8.
- 322 3- Dzemiczic V, Sokic E, Tiro A, Nakas E. Computer based assessment of cervical vertebral  
323 maturation stages using digital lateral Cephalograms. *Acta Inform Med* 2015; (23): 364–8.
- 324 4- Baccetti T, Franchi L, McNamara JA. The cervical vertebral maturation (CVM) method for  
325 the assessment of optimal treatment timing in Dentofacial orthopedics. *Semin Orthod* 2005;  
326 (11): 119–29.
- 327 5- Cericato GO, Bittencourt MA, Paranhos LR. Validity of the assessment method of skeletal  
328 maturation by cervical vertebrae: a systematic review and meta-analysis. *Dentomaxillofac*  
329 *Radiol* 2015; 44(4):20140270.
- 330 6- Bunch PM, Altes TA, McIlhenny J, Patrie J, Gaskin CM. Skeletal development of the hand  
331 and wrist: Digital bone age companion-a suitable alternative to the Greulich and Pyle atlas for  
332 bone age assessment? *Skelet Radiol* 2017; (46): 785–793.
- 333 7- Amasya H, Yildirim D, Aydogan T, Kemaloglu N, Orhan K. Cervical vertebral maturation  
334 assessment on lateral cephalometric radiographs using artificial intelligence: comparison of  
335 machine learning classifier models. *Dentomaxillofac Radiol* 2020; 49(5):20190441.
- 336 8- Freitas LM, Freitas KM, Pinzan A, Janson G, Freitas MR. A comparison of skeletal,  
337 dentoalveolar and soft tissue characteristics in white and black Brazilian subjects. *J Appl Oral*  
338 *Sci* 2010; (18):135-42.



- 339 9- Souza KRS, Oltramari-Navarro PVP, Navarro RL, Conti ACCF, Almeida MR. Reliability of a  
340 method to conduct upper airway analysis in cone-beam computed tomography. *Braz Oral Res*  
341 2013; (27):48-54.
- 342 10- Sohrabi A, Babay Ahari S, Moslemzadeh H, Rafighi A, Aghazadeh Z. The reliability of  
343 clinical decisions based on the cervical vertebrae maturation staging method. *Eur J Orthod*  
344 2016; 38(1):8-12.
- 345 11- Hosni S, Burnside G, Watkinson S, Harrison JE. Comparison of statural height growth  
346 velocity at different cervical vertebral maturation stages. *Am J Orthod Dentofac Orthop* 2018;  
347 (154): 545–553.
- 348 12- Perinetti G, Contardo L, Castaldo A, McNamara JA, Franchi L. Diagnostic reliability of the  
349 cervical vertebral maturation method and standing height in the identification of the  
350 mandibular growth spurt. *Angle Orthod* 2016; (86): 599–609.
- 351 13- Nestman TS, Marshall SD, Qian F, Holton N, Franciscus RG, Southard TE. Cervical  
352 vertebrae maturation method morphologic criteria: poor reproducibility. *Am J Orthod*  
353 *Dentofacial Orthop* 2011; (140): 182–8.
- 354 14- Schwendicke F, Samek W, Krois J. Artificial Intelligence in Dentistry: Chances and  
355 Challenges. *J Dent Res* 2020; 99(7):769-774.
- 356 15- Kim EG, Oh IS, So JE, Kang J, Le VNT, Tak MK, et al. Estimating Cervical Vertebral  
357 Maturation with a Lateral Cephalogram Using the Convolutional Neural Network. *J Clin Med*  
358 2021; 10(22):5400.
- 359 16- Shen D, Wu G, Suk HI. Deep Learning in Medical Image Analysis. *Annu Rev Biomed Eng*  
360 2017; (19): 221–248.

- 361 17- Huang M, Huang S, Zhang Y, Bhatti U. Medical Image Segmentation Using Deep Learning  
362 with Feature Enhancement. IET Image Processing 2020; 14. 10.1049/iet-ipr.2019.0772
- 363 18- Schlempe J, Oktay O, Schaap M, Heinrich M, Kainz B, Glocker B, et al. Attention gated  
364 networks: learning to leverage salient regions in medical images. Med Image Anal 2019; (53):  
365 197–207
- 366 19- Schwendicke F, Golla T, Dreher M, Krois J. Convolutional neural networks for dental image  
367 diagnostics: A scoping review. J Dent 2019; (91): 103226.
- 368 20- Kok H, Acilar AM, Izgi MS. Usage and comparison of artificial intelligence algorithms for  
369 determination of growth and development by cervical vertebrae stages in orthodontics. Prog.  
370 Orthod 2019; 20(1): 41.
- 371 21- Zhou X, Takayama R, Wang S, Hara T, Fujita H. Deep learning of the sectional appearances  
372 of 3d ct images for anatomical structure segmentation based on an fcn voting method Med.  
373 Phys 2017; 644(10): 5221–5233
- 374 22- Gribel BF, Gribel MN, Frazão DC, McNamara JA Jr, Manzi FR. Accuracy and reliability of  
375 craniometric measurements on lateral cephalometry and 3D measurements on CBCT scans.  
376 Angle Orthod 2011; 81(1):26-35.
- 377 23- Grauer D, Cevidanes LS, Proffit WR. Working with DICOM craniofacial images. Am J  
378 Orthod Dentofacial Orthop 2009; (136):460–470.
- 379 24- Alqerban A, Willems G, Bernaerts C, Vangastel J, Politis C, Jacobs R. Orthodontic treatment  
380 planning for impacted maxillary canines using conventional records versus 3D CBCT. Eur J  
381 Orthod 2014; 36(6):698-707

- 382 25- Atici SF, Ansari R, Allareddy V, Suhaym O, Cetin AE, Elnagar MH. Fully automated  
383 determination of the cervical vertebrae maturation stages using deep learning with directional  
384 filters. PLoS One 2022; 17(7): e0269198. doi: 10.1371/journal.pone.0269198.
- 385 26- Makaremi M, Lacaule C, Mohammad-Djafari A. Deep learning and artificial intelligence for  
386 the determination of the cervical vertebrae maturation degree from lateral radiography.  
387 Entropy 2019; (21): 1222.
- 388 27- Khened M, Kollerathu VA, Krishnamurthi G. Fully convolutional multiscale residual  
389 densenets for cardiac segmentation and automated cardiac diagnosis using ensemble of  
390 classifiers Med Image Anal 2018; 2(51): 21–45
- 391 28- Fourcade A, Khonsari RH. Deep learning in medical image analysis: a third eye for doctors.  
392 J Stomatol Oral Maxillofac Surg 2019; 120(4):279–288.
- 393 29- Seo H, Hwang J, Jeong T, Shin J. Comparison of Deep Learning Models for Cervical  
394 Vertebral Maturation Stage Classification on Lateral Cephalometric Radiographs. J Clin Med  
395 2021; 10(16):3591.
- 396 30- Pinsky HM, Dyda S, Pinsky RW, Misch KA, Sarment DP. Accuracy of three-dimensional  
397 measurements using cone beam CT. Dentomaxillofac Radiol 2006; 35(6):410–416.
- 398 31- Korbmacher H, Kahl-Nieke B, Schollchen M, Heiland M. Value of two cone-beam  
399 computed tomography systems from an orthodontic point of view. J Orofac Orthop 2007;  
400 68(4):278– 289.
- 401 32- Ludlow JB, Gubler M, Cevidanes L, Mol A. Precision of cephalometric landmark  
402 identification: cone-beam computed tomography vs. conventional cephalometric views. Am J  
403 Orthod Dentofacial Orthop 2009; 136(3):312. e1-e10

- 404 33- Valizadeh S, Tavakkoli MA, Karimi Vasigh H, Azizi Z, Zarrabian T. Evaluation of cone  
405 beam computed tomography (CBCT) system: Comparison with intraoral periapical  
406 radiography in proximal caries detection. *J Dent Res, Dent Clin, Dent Prospects* 2012;  
407 6(1):1-5
- 408 34- Bonfim MA, Costa AL, Fuziy A, Ximenez ME, Cotrim-Ferreira FA, Ferreira-Santos RI.  
409 Cervical vertebrae maturation index estimates on cone beam CT: 3D reconstructions vs  
410 sagittal sections. *Dentomaxillofacial Radiol* 2016; 45(1):20150162
- 411 35- McNamara JA Jr, Franchi L. The cervical vertebral maturation method: A user's guide.  
412 *Angle Orthod* 2018; 88(2):133-143.
- 413 36- Zhou J, Zhou H, Pu L, Gao Y, Tang Z, Yang Y, et al. Development of an Artificial  
414 Intelligence System for the Automatic Evaluation of Cervical Vertebral Maturation Status  
415 Diagnostics (Basel) 2021; 11(12):2200.
- 416 37- Arik SO, Ibragimov B, Xing L. Fully automated quantitative cephalometry using  
417 convolutional neural networks. *J Med Imaging* 2017; 4(1): 014501.
- 418 38- Yang X, Wu N, Cheng G, Zhou Z, Yu DS, Beitler JJ, et al. Automated segmentation of the  
419 parotid gland based on atlas registration and machine learning: a longitudinal MRI study in  
420 head-and neck radiation therapy. *Int J Radiat Oncol Biol Phys* 2014; 90(5):1225–1233.
- 421 39- Baptista RS, Quaglio CL, Mourad LMEH, Hummel AD, Caetano CAC, Ortolani CLF, Pisa  
422 IT. A semi-automated method for bone age assessment using cervical vertebral maturation.  
423 *Angle Orthod* 2012; 82(4): 658–62.
- 424 40- Bayrakdar IS, Orhan K, Çelik Ö, Bilgir E, Sağlam H, Kaplan FA, et al. A U-Net Approach to  
425 Apical Lesion Segmentation on Panoramic Radiographs. *Biomed Res Int* 2022;  
426 2022:7035367. doi: 10.1155/2022/7035367.



Confusion Matrix with labels

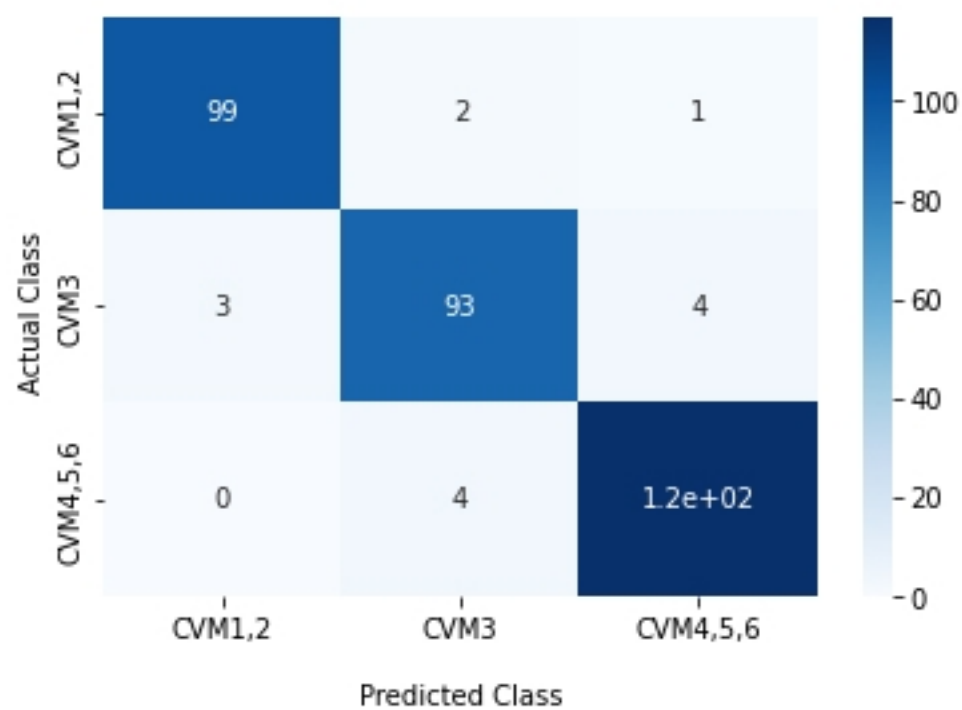

(a)

Confusion Matrix with labels

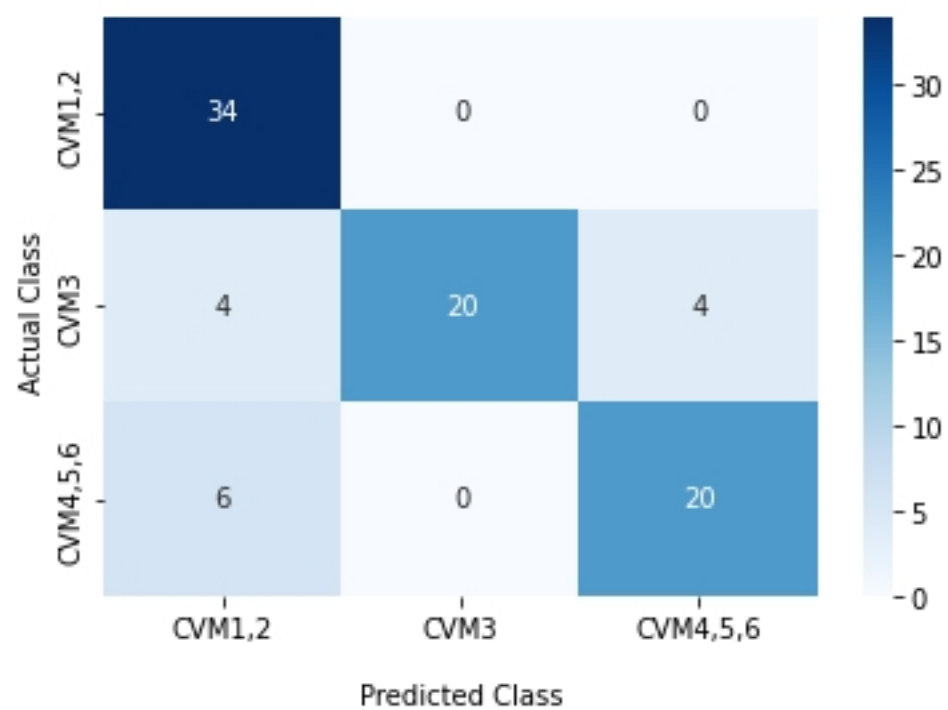

(b)

Figure 2

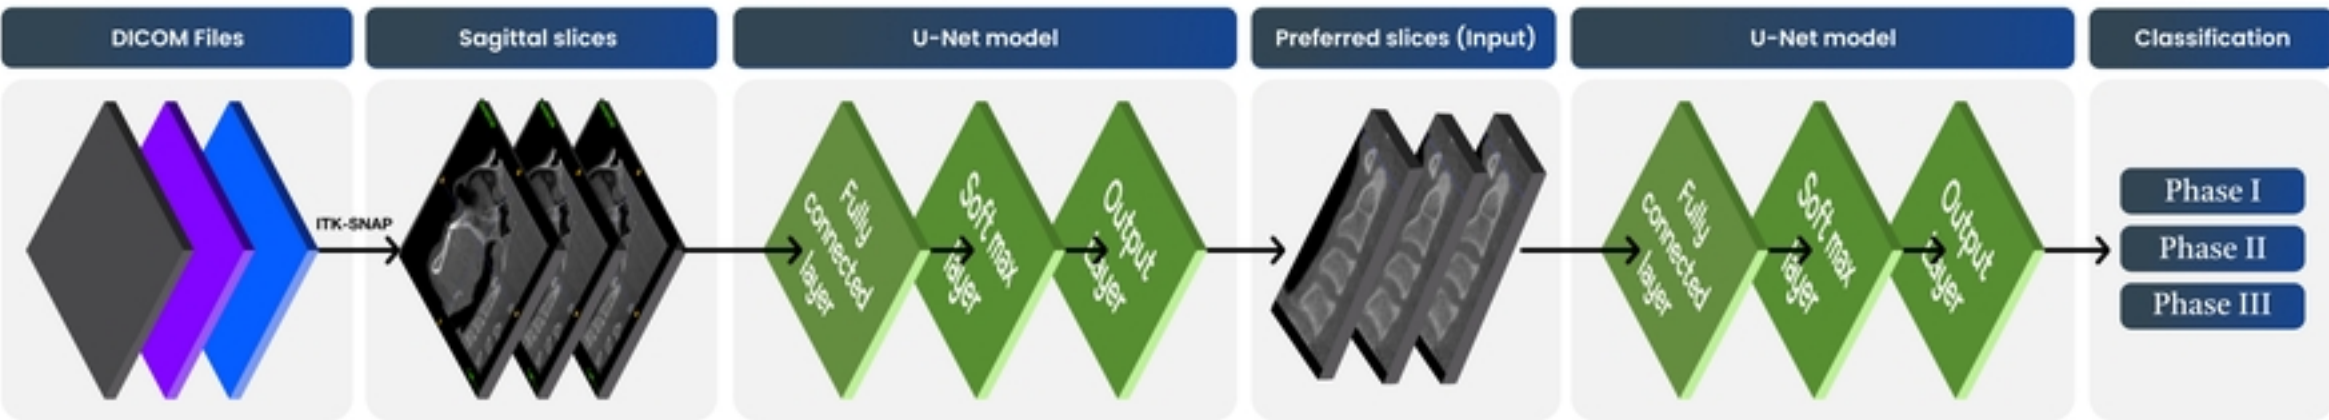

Figure 1
